# Supplementary material for: Metabolomic and Transcriptomic Analysis of the Anthocyanin Regulatory Networks in Malus Domestica Borkh. Peel with Different Color Patterns
Source: Research Square preprint supplement (doi:10.21203/rs.3.rs-1151652/v1), 2021-12-14
Supplement: Supplementary file 1 [file f3a7f4484f1c5a9ba601194b.xls]

## Sheet: Sheet1
Index	Formula	Compounds	物质	Class I	物质一级分类	Class II	物质二级分类	CAS	Level	SF1_vs_HM1	SF2_vs_HM2	SF3_vs_HM3	SF1-1	SF1-2	SF1-3	HM1-1	HM1-2	HM1-3	SF2-1	SF2-2	SF2-3	HM2-1	HM2-2	HM2-3	SF3-1	SF3-2	SF3-3	HM3-1	HM3-2	HM3-3	cpd_ID	kegg_map
pmf0096	C2H2O4	Oxalic acid	草酸	Phenolic acids	酚酸类	Phenolic acids	酚酸类	144-62-7	B	up	FALSE	FALSE	29161	16164	25866	194110	233480	199870	37889	42773	41730	37063	37984	36841	79242	84752	87510	67989	48496	54608	C00209	ko00230,ko00630,ko01100
pme0010	C3H7NO3	L-Serine	L-丝氨酸	Amino acids and derivatives	氨基酸及其衍生物	Amino acids and derivatives	氨基酸及其衍生物	56-45-1	A	FALSE	FALSE	down	1445700	1616500	1723500	2257200	2352400	1760800	1503200	1612500	1524300	1368500	1480000	1241200	2665500	2673400	2339700	985360	1032000	1017700	C00065	ko00260,ko00261,ko00270,ko00460,ko00600,ko00630,ko00920,ko00970,ko01100,ko01110,ko01200,ko01230,ko02010
pme2433	C4H11NO2	Diethanolamine	二乙醇胺	Alkaloids	生物碱	Alkaloids	生物碱	111-42-2	B	FALSE	FALSE	down	98115	105620	101370	113840	124550	102660	88017	82244	90342	71600	78223	77039	160060	144870	131020	57323	47456	46647	C06772	ko00564
mws0191	C5H11NO2	Betaine	甜菜碱	Alkaloids	生物碱	Alkaloids	生物碱	107-43-7	A	up	FALSE	FALSE	211910	256030	252920	1570500	1650400	1444000	328510	219210	239630	181190	229640	193840	260530	306320	285880	294660	230110	196260	C00719	ko00260,ko01100,ko02010
mws0230	C4H9NO3	L-Threonine*	L-苏氨酸*	Amino acids and derivatives	氨基酸及其衍生物	Amino acids and derivatives	氨基酸及其衍生物	72-19-5	A	FALSE	FALSE	down	2137000	2102000	2270300	2574100	2627600	2362700	1877200	1966000	1818700	1985900	2091900	2032400	3252300	3348600	3119900	1633100	1479600	1401000	C00188	ko00260,ko00261,ko00290,ko00860,ko00970,ko01100,ko01110,ko01230,ko02010
pma0134	C4H8O4	D-(-)-Threose	D-(-)-苏阿糖	Others	其它类	Saccharides and Alcohols	糖及醇类	95-43-2	B	up	FALSE	FALSE	39650	32485	36497	241000	248540	252230	75645	76415	73633	71078	75804	75216	98647	82041	86515	110380	114940	101820	C06463	--
mws0236	C2H7NO3S	2-Aminoethanesulfonic acid	2-氨基乙烷磺酸	Organic acids	有机酸	Organic acids	有机酸	107-35-7	B	up	FALSE	FALSE	9357.5	13321	15931	26098	28874	24601	15073	20342	22048	28125	18764	18228	40426	21272	37594	30457	31359	23196	C00245	ko00430,ko00920,ko01100,ko02010
Rfmb319	C6H11NO2	Pipecolic acid	哌啶酸	Amino acids and derivatives	氨基酸及其衍生物	Amino acids and derivatives	氨基酸及其衍生物	4043-87-2	B	up	FALSE	down	298760	283410	309320	920780	963910	962190	533420	612230	592000	995230	1122700	1114300	2337000	2151300	2146700	1001500	924790	1017400	C00408	ko00310,ko00960,ko01100,ko01110
ML10181668	C6H11NO2	Cycloleucine	环亮氨酸	Amino acids and derivatives	氨基酸及其衍生物	Amino acids and derivatives	氨基酸及其衍生物	52-52-8	B	FALSE	FALSE	down	1487700	1467100	1552700	1475000	1591200	1198900	1230900	1384400	1448200	739180	897220	852200	2862500	2667800	2556400	1138700	973590	895210	C03969	--
mws0425	C5H6O4	Citraconic acid	柠康酸	Organic acids	有机酸	Organic acids	有机酸	498-23-7	A	up	FALSE	FALSE	9	9	9	15193	17940	27802	47567	52770	49794	52456	2443900	46997	426180	401140	385300	267100	290970	255110	C02226	ko00290,ko00660,ko01100,ko01210
pme2693	C6H14N2O	N-Acetylputrescine	N-乙酰腐胺	Alkaloids	生物碱	Phenolamine	酚胺	18233-70-0	B	FALSE	FALSE	down	2377.4	3112.6	6582.1	3165.5	5351.5	5018.2	5211	5098.4	4306.5	3418.8	2630.5	2390	46045	43611	40022	10048	12974	12639	C02714	ko00330,ko01100
pmb0501	C5H14N4	Agmatine	胍丁胺	Alkaloids	生物碱	Phenolamine	酚胺	306-60-5	B	FALSE	FALSE	down	4256.5	2833.5	4383.1	4570.5	3203.8	3783.9	7102.1	7688.8	6072.7	3582.1	6340.9	3758.3	50955	52402	50769	14954	12764	11672	C00179	ko00330,ko01100
mws0704	C2H8NO4P	O-Phosphorylethanolamine	磷酸乙醇胺	Alkaloids	生物碱	Alkaloids	生物碱	1071-23-4	B	FALSE	FALSE	down	28112	28541	23938	32115	32038	32540	35482	28222	30670	30883	25286	30881	44791	59684	66788	19623	21077	25550	C00346	ko00564,ko00600,ko01100
pme3207	C6H6O4	Muconic acid	己二烯二酸	Organic acids	有机酸	Organic acids	有机酸	1119-72-8	A	up	FALSE	down	372710	409140	397090	936600	955830	908770	564940	554020	605270	410050	422930	396930	1847300	1941100	1832200	719840	709810	756430	C02480	ko01100
pme2380	C5H6O5	α-Ketoglutaric acid	α-酮戊二酸	Organic acids	有机酸	Organic acids	有机酸	328-50-7	B	FALSE	FALSE	down	300560	282730	266060	270660	317450	302260	333340	337400	292420	345020	302420	303590	186020	172870	197040	94839	78580	87398	C00026	ko00020,ko00040,ko00053,ko00220,ko00250,ko00300,ko00310,ko00340,ko00430,ko00630,ko00650,ko00660,ko01100,ko01110,ko01200,ko01210,ko01230
Lmbn001609	C6H10O4	2-Acetyl-2-Hydroxybutanoic Acid	2-乙酰-2-羟基丁酸	Organic acids	有机酸	Organic acids	有机酸	-	B	up	FALSE	FALSE	7401.6	6971.9	15206	17245	23399	20578	16919	24478	26106	13402	12446	19797	20288	19417	16588	9065.7	17437	15928	C06006	ko00290,ko01100,ko01110,ko01210,ko01230
mws0208	C6H10O4	Adipic Acid	己二酸	Organic acids	有机酸	Organic acids	有机酸	124-04-9	B	up	FALSE	FALSE	61026	52407	50752	170530	144850	133750	130920	138510	124450	83267	81342	91075	121000	127750	116680	101070	81690	82325	C06104	ko01100
pme1210	C5H11NO2S	L-Methionine	L-甲硫氨酸	Amino acids and derivatives	氨基酸及其衍生物	Amino acids and derivatives	氨基酸及其衍生物	63-68-3	A	FALSE	up	FALSE	2073100	2272100	1917500	3587700	3318700	3347200	1249000	1083900	1054000	2202800	2366100	2446400	628540	459600	443420	483000	402650	401060	C00073	ko00270,ko00966,ko00970,ko01100,ko01110,ko01210,ko01230
mws0921	C9H10O2	p-Coumaryl alcohol	对香豆醇	Phenolic acids	酚酸类	Phenolic acids	酚酸类	3690-05-9	B	up	up	up	9	9	9	10036	8440.3	7263.2	9725.7	12846	9082.5	25293	31851	28328	98476	99783	105740	202890	203140	206080	C02646	ko00940,ko01100,ko01110
mws0254	C6H9N3O2	L-Histidine	L-组氨酸	Amino acids and derivatives	氨基酸及其衍生物	Amino acids and derivatives	氨基酸及其衍生物	71-00-1	B	up	up	FALSE	163870	158040	132460	817200	855140	777140	194560	203860	181750	553100	499450	564300	509590	459300	541360	281020	335350	350730	C00135	ko00340,ko00410,ko00970,ko01100,ko01110,ko01230,ko02010
pmb0819	C10H8N2	3-Indoleacetonitrile	3-吲哚乙腈	Alkaloids	生物碱	Plumerane	吲哚类生物碱	771-51-7	B	up	FALSE	FALSE	4622.4	3506.2	2767	14575	16055	14681	5514.5	4135.1	6997.2	7204.8	11697	12189	9	9	9	9	9	9	C02938	ko00380,ko01100
pmb0142	C9H8O3	Caffeic aldehyde	咖啡醛	Phenolic acids	酚酸类	Phenolic acids	酚酸类	141632-15-7	B	up	FALSE	FALSE	9	9	9	2479.6	2430.4	1910.7	6158	3735	6644	4262.3	5508.8	3295.3	7845.8	9788	9121.9	6737.8	5536.7	6648.4	C10945	ko00940,ko01110
Lmdp003146	C10H14O2	Rhododendrol	杜鹃花醇	Phenolic acids	酚酸类	Phenolic acids	酚酸类	501-96-2	B	FALSE	FALSE	down	27548	22442	36694	27175	20210	24919	34660	38362	24123	29616	15608	24285	6771.5	23365	26773	9	9	9	--	--
mws0242	C8H14O4	Suberic Acid	辛二酸	Organic acids	有机酸	Organic acids	有机酸	505-48-6	B	up	FALSE	FALSE	17817	16220	29891	51060	38412	54901	24752	29548	38575	23421	15289	22987	36810	44878	37270	41767	25916	46375	C08278	--
Hmcp009963	C11H18NO+	Candicine	白栝楼碱	Alkaloids	生物碱	Alkaloids	生物碱	6656-13-9	B	up	FALSE	FALSE	115390	105820	111700	263340	234140	235030	219180	212510	214050	130820	134140	142810	233780	228260	224350	235180	232110	225330	C10575	--
mws1350	C9H10O4	Syringaldehyde; 4-Hydroxy-3,5-Dimethoxybenzaldehyde	丁香醛; 4-羟基-3,5-二甲氧基苯甲醛	Phenolic acids	酚酸类	Phenolic acids	酚酸类	134-96-3	B	up	FALSE	FALSE	6122.9	7310.6	4688.8	10605	12240	17224	13242	6996.3	8164.1	14019	12268	15225	5262.7	5569.3	5581.9	8794.5	7326.6	12584	--	--
pmb1754	C5H15NO4P+	O-Phosphocholine	O-磷酸胆碱	Alkaloids	生物碱	Alkaloids	生物碱	107-73-3	B	FALSE	FALSE	down	254330	258340	225920	200640	202230	181120	134960	125590	91486	58841	85475	63554	194350	154170	153360	44453	48332	49409	C00588	ko00564,ko01100
pme2602	C3H8NO6P	O-Phospho-L-serine	O-磷酸-L-丝氨酸	Amino acids and derivatives	氨基酸及其衍生物	Amino acids and derivatives	氨基酸及其衍生物	407-41-0	B	down	FALSE	FALSE	4607.1	5199	3144.8	9	9	9	3990.2	6035.8	4541.2	6130.9	4355.3	5248.2	5871.6	5083.7	5775.4	4669.7	2496.2	2937.1	C01005	ko00260,ko00270,ko00970,ko01100,ko01110,ko01200,ko01230
Hmmp001310	C11H9NO2	3-Indoleacrylic acid	3-吲哚丙烯酸	Alkaloids	生物碱	Alkaloids	生物碱	1204-06-4	B	up	up	FALSE	178570	196600	202690	630850	673990	684390	207700	199230	193500	650270	661950	664040	222690	210560	202360	218720	241220	232350	C21283	--
Zmjp000182	C7H16N4O2	N-Monomethyl-L-arginine*	N-单甲基-L-精氨酸*	Amino acids and derivatives	氨基酸及其衍生物	Amino acids and derivatives	氨基酸及其衍生物	17035-90-4	B	up	FALSE	FALSE	77726	82932	67301	128150	189690	158940	106780	121180	150320	151190	140280	177900	161160	151340	132120	98109	111780	131080	C03884	--
pme3388	C7H16N4O2	Homoarginine*	高精氨酸*	Amino acids and derivatives	氨基酸及其衍生物	Amino acids and derivatives	氨基酸及其衍生物	156-86-5	B	up	FALSE	FALSE	17996	11194	15514	34728	33001	32151	30471	30379	28816	29698	32573	32020	40315	35809	25714	26483	21807	20967	C01924	--
NK10251888	C8H18N4O2	NG,NG-Dimethyl-L-arginine	NG,NG-二甲基-L-精氨酸	Amino acids and derivatives	氨基酸及其衍生物	Amino acids and derivatives	氨基酸及其衍生物	30315-93-6	B	up	FALSE	FALSE	71362	65285	56999	201460	149610	164080	117570	125390	119410	84834	119250	98687	141760	130190	99955	97054	110110	84868	C03626	--
mws0282	C11H12N2O2	L-Tryptophan*	L-色氨酸*	Amino acids and derivatives	氨基酸及其衍生物	Amino acids and derivatives	氨基酸及其衍生物	73-22-3	A	up	up	FALSE	49566	52605	56247	195870	203720	190850	59703	72269	57855	183930	187630	197690	63278	57993	65742	62153	60707	63585	C00078	ko00260,ko00380,ko00400,ko00901,ko00966,ko00970,ko00998,ko01100,ko01110,ko01210,ko01230
Zmbp002538	C11H12N2O2	1-Methoxy-indole-3-acetamide*	1-甲氧基-吲哚-3-乙酰胺*	Alkaloids	生物碱	Alkaloids	生物碱	-	A	up	up	FALSE	447840	448230	493030	1758400	1777800	1828600	542910	569560	544420	1683900	1743400	1816400	595710	578490	588820	708460	645580	645610	--	--
pmb0818	C11H11NO3	Methoxyindoleacetic acid	甲氧基吲哚乙酸	Alkaloids	生物碱	Plumerane	吲哚类生物碱	3471-31-6	B	up	up	FALSE	5104.5	5097.1	5851.4	20764	15355	14177	7124.6	5088.6	7168.1	18794	22072	22422	6232.6	7357.5	6215.7	4812.6	7885.6	8652.5	C05660	ko00380
pme1261	C9H19NO4	D-Panthenol	D-泛酰醇	Others	其它类	Saccharides and Alcohols	糖及醇类	81-13-0	B	up	FALSE	down	2028	1870.2	1861.2	14278	17410	17581	3295.9	1244.8	2962.7	2174.2	3194.2	1860.1	15424	15409	16775	8106.1	5632.7	7355.6	C05944	ko00770
mws0853	C11H14O4	Sinapyl alcohol	芥子醇	Phenolic acids	酚酸类	Phenolic acids	酚酸类	537-33-7	B	up	FALSE	FALSE	9	9	9	5324.7	3462.3	4982.6	27065	31216	29813	32863	34027	34711	5346.8	4355.5	4054.3	8723.9	9352.9	7487.4	C02325	ko00940,ko01100,ko01110
pmb2643	C14H26O2	Myristoleic acid	肉豆蔻油酸	Lipids	脂质	Free fatty acids	游离脂肪酸	544-64-9	A	up	FALSE	FALSE	1647.5	1589.3	1333.1	4772.7	3555.7	3322.4	1336	2762.8	1610.2	1353.2	1125.5	1361.7	1666	959.62	1183.6	1488.2	1960.1	1443.4	C08322	--
pmb2591	C13H14N2O3	N-Acetyl-L-Tryptophan	N-乙酰-L-色氨酸	Amino acids and derivatives	氨基酸及其衍生物	Amino acids and derivatives	氨基酸及其衍生物	1218-34-4	A	up	up	FALSE	173900	181560	198660	1153300	1246900	1200100	326150	310100	298390	1025400	1183900	1187500	1278500	966580	1347000	1480900	1260900	1668200	--	--
Lmcn009122	C16H30O2	(7Z)-Hexadecenoic acid	(7Z)-十六碳烯酸	Lipids	脂质	Free fatty acids	游离脂肪酸	2416-19-5	A	up	FALSE	FALSE	1943.7	2954.2	3189.8	8156	6697.7	6093.4	3816.2	4085.9	4028.9	2417.1	2304.3	2764.8	5383.9	3096.8	3255.7	3190.3	3728	3947.9	--	--
mws0361	C16H30O2	Palmitoleic Acid	棕榈油酸	Lipids	脂质	Free fatty acids	游离脂肪酸	373-49-9	A	up	FALSE	FALSE	2876.1	2148.5	1912.7	7191.1	6386.1	5236.7	3420.5	2672	3122.6	1611	1690.2	1961.4	4969.7	1580.5	3536.6	2338.7	3636.3	4079.4	C08362	ko00061
pmb0952	C12H17N4OS+	Thiamine (Vitamin B1)	硫胺素 (维生素 B1)	Others	其它类	Vitamin	维生素	70-16-6	B	up	FALSE	up	42619	77085	93054	127270	237120	197920	166620	146600	141760	163840	198780	171060	33744	20460	19605	90070	91202	49874	C00378	ko00730,ko01100,ko02010,ko04122
mws1662	C16H12O4	Tectochrysin	杨芽黄素	Flavonoids	黄酮	Flavonoid	黄酮	520-28-5	B	FALSE	down	FALSE	4307.6	4333.6	6237	3377.3	3841.9	3360.3	5636.3	5462.6	4535.9	2558.3	2135.5	2930.9	6244.6	7292.4	4835.9	3186.7	3806.6	3866.8	C11621	--
mws0383	C17H32O2	10-Heptadecenoic Acid	10-十七碳烯酸	Lipids	脂质	Free fatty acids	游离脂肪酸	29743-97-3	B	up	FALSE	FALSE	63748	45516	55588	142490	143350	118710	55258	62685	61135	24789	31166	35173	67767	65540	64565	86178	87480	90942	--	--
pmp000021	C16H14O5	Isooxypeucedanine*	异氧化前胡内酯*	Lignans and Coumarins	木脂素和香豆素	Coumarins	香豆素	5058-15-1	B	up	FALSE	down	2614.2	2114.7	2751	6140.2	5592.2	5022.5	42566	36268	67196	46311	46316	31664	673460	614270	630150	36330	25155	23644	--	--
mws1094	C15H12O6	Aromadendrin (Dihydrokaempferol)	香橙素 (二氢山奈酚)	Flavonoids	黄酮	Dihydroflavonol	二氢黄酮醇	480-20-6	B	FALSE	FALSE	down	9	9	9	9	9	9	4745.1	5732	5379.9	3002.8	4285.2	3138.3	8935.1	8492.3	9671.1	9	9	9	C00974	ko00941,ko01100,ko01110
Zmyn004548	C18H28O3	12-Oxo-phytodienoic acid	12-氧-植物二烯酸	Lipids	脂质	Free fatty acids	游离脂肪酸	85551-10-6	B	FALSE	FALSE	down	580.47	869.53	440.8	288.24	751.74	424.31	848.01	1129	1091.6	1372	1329.3	1415.2	756.23	1174.6	988.24	9	9	9	C01226	ko00592,ko01100,ko01110
Lmcn009539	C19H34O2	E,E,Z-1,3,12-Nonadecatriene-5,14-diol	E,E,Z-1,3,12-十九碳三烯-5,14-二醇	Lipids	脂质	Free fatty acids	游离脂肪酸	-	A	FALSE	down	FALSE	332260	414440	472670	386700	392740	439090	433980	488470	441900	219150	224000	233190	970870	880960	879740	1012800	945320	1008300	--	--
mws0058	C16H12O6	Diosmetin (5,7,3'-Trihydroxy-4'-methoxyflavone)	香叶木素	Flavonoids	黄酮	Flavonoid	黄酮	520-34-3	B	up	FALSE	FALSE	9	9	9	685.25	598.37	750.76	1888.3	1365.5	1936.6	962.82	1413.1	1591.3	2615.5	1940.3	2882.1	2362.9	2180.7	3069.4	C10038	--
Lmbn014696	C20H30O2	Pimaric acid	海松酸	Terpenoids	萜类	Ditepenoids	二萜	127-27-5	A	FALSE	up	FALSE	28984	43034	27819	40885	39676	47123	19869	17247	13946	37017	40489	37767	40946	26926	34400	26980	24822	25888	C09159	--
pmb2857	C11H19NO9	L-Glutamic acid-O-glycoside	L-谷氨酸-O-葡萄糖苷	Amino acids and derivatives	氨基酸及其衍生物	Amino acids and derivatives	氨基酸及其衍生物	-	B	FALSE	down	FALSE	48385	45543	37985	29728	42997	36930	41360	28257	52551	16811	17686	26014	28995	60708	47762	19891	26533	30656	--	--
pmn001606	C20H38O2	Eicosenoic acid	二十碳烯酸	Lipids	脂质	Free fatty acids	游离脂肪酸	26764-41-0	B	FALSE	down	FALSE	871110	1103800	885450	625090	773800	724910	1088200	1304000	1176300	474740	471420	459540	1158000	901560	1011500	962080	971280	1102900	C16526	ko01040
pme3967	C12H17N5O5	2-(Dimethylamino)guanosine	2-(二甲基氨基)鸟苷	Nucleotides and derivatives	核苷酸及其衍生物	Nucleotides and derivatives	核苷酸及其衍生物	2140-67-2	B	FALSE	FALSE	down	14446	14035	12764	8827.2	11782	13057	37001	33965	35930	25009	30414	25800	48817	56036	52380	21209	20150	19177	--	--
Lmtn003441	C15H20O7	2-Acetyl-3-hydroxyphenyl-1-O-glucoside	2-乙酰基-3-羟基苯基-1-O-葡萄糖苷	Phenolic acids	酚酸类	Phenolic acids	酚酸类	-	A	FALSE	up	up	72041	60799	55128	59315	79525	51083	63713	59652	66539	131660	156490	154980	57982	56207	51530	114250	128190	97765	--	--
mws1174	C17H14O6	3-O-Acetylpinobanksin	3-O-乙酰短叶松黄烷酮	Flavonoids	黄酮	Dihydroflavonol	二氢黄酮醇	52117-69-8	B	up	FALSE	FALSE	4915.5	5528.2	11536	16902	26208	11120	8714.1	11232	11622	6274.2	12455	8238	18309	17489	22103	19067	18489	29337	C16418	ko00941
mws0582	C11H19N3O6S	S-(Methyl)glutathione	S-甲基谷胱甘肽	Amino acids and derivatives	氨基酸及其衍生物	Amino acids and derivatives	氨基酸及其衍生物	2922-56-7	B	up	FALSE	FALSE	46873	36192	39638	112050	109200	97799	49491	56312	43137	54519	56906	58018	29381	26250	29620	59684	29292	25440	C11347	--
Lmmn001552	C14H20O9	Leonuriside A	4-羟基-2,6-二甲氧基苯-1-O-葡萄糖苷	Phenolic acids	酚酸类	Phenolic acids	酚酸类	121748-12-7	B	FALSE	down	down	9	9	9	9	9	9	101510	109500	90221	34825	28913	31321	400300	422440	361550	72519	71830	72972	--	--
Hmln002806	C16H16O8	5-O-Caffeoylshikimic acid	5-O-咖啡酰莽草酸	Phenolic acids	酚酸类	Phenolic acids	酚酸类	180981-12-8	A	FALSE	FALSE	down	40242	36570	38662	28008	21137	28884	171230	157230	160090	117960	111050	117390	218050	206500	170190	86931	78824	63852	C10434	ko00940,ko00941,ko00945,ko01100,ko01110
Xmgp006913	C20H20O5	2,4,2',4'-tetrahydroxy-3'-prenylchalcone	2,4,2',4'-四羟基-3'-异戊烯基查尔酮	Flavonoids	黄酮	Chalcones	查耳酮	-	B	FALSE	up	FALSE	105620	107780	102130	81518	72665	72223	27026	24848	25833	70346	61430	61322	9	9	9	9	9	9	--	--
pmn001420	C15H18O9	1-O-[(E)-Caffeoyl]-D-glucose	1-O-[(E)-咖啡酰]-D-葡萄糖	Phenolic acids	酚酸类	Phenolic acids	酚酸类	-	A	FALSE	down	down	6206300	5591200	5751700	3522900	3835900	3720900	3776000	2981000	3364600	1637500	1714200	1628200	1828800	2168200	1934100	1087500	961210	882010	--	--
pmb3056	C16H20O9	Homovanilloylquinic acid	高香草酰奎宁酸	Phenolic acids	酚酸类	Phenolic acids	酚酸类	-	B	FALSE	FALSE	up	4112.6	6680.3	6054.6	8460.9	7954	9939.2	8416.9	10093	9491.1	7383.5	7975.6	8657.5	5039.3	10277	4437.2	10781	17188	14502	--	--
Lmgp003270	C16H16O10	Scopoletin-7-O-glucuronide	东莨菪内酯-7-O-葡萄糖醛酸苷	Lignans and Coumarins	木脂素和香豆素	Coumarins	香豆素	132752-65-9	A	FALSE	FALSE	down	70248	68057	61276	65132	75496	65395	171270	162920	154980	198640	182390	151410	411330	399120	375330	116910	103060	101070	--	--
pma3724	C17H20O9	1-O-Feruloylquinic acid	1-O-阿魏酰奎宁酸	Phenolic acids	酚酸类	Phenolic acids	酚酸类	-	A	FALSE	FALSE	down	93676	90381	93622	80787	89171	86390	209700	234340	244040	240510	194090	214060	489400	409880	462320	135740	114580	132740	--	--
mws0179	C17H20O9	Chlorogenic acid methyl ester	绿原酸甲酯	Phenolic acids	酚酸类	Phenolic acids	酚酸类	29708-87-0	B	FALSE	FALSE	down	10888	11801	8669.4	7522.4	9794.8	6342.9	73841	75694	74202	69057	59309	55458	130990	137090	144210	57322	40143	47734	--	--
Lmmp010562	C24H38O4	Diisooctyl Phthalate*	邻苯二甲酸二异辛酯*	Phenolic acids	酚酸类	Phenolic acids	酚酸类	27554-26-3	B	up	FALSE	FALSE	778880	775830	685190	954290	1881300	1717200	780500	1109000	1004500	1072500	498940	502890	537260	957590	765530	870250	916450	914720	C14577	--
pmn001350	C20H24O9	Torachrysone-8-O-glucoside	决明酮-8-O-葡萄糖苷	Phenolic acids	酚酸类	Phenolic acids	酚酸类	64032-49-1	A	up	up	up	17016	13480	16690	35406	43146	40478	41609	29475	21374	73340	89194	80077	14281	17924	19318	54855	75385	55547	--	--
pmn001637	C20H18O10	Kaempferol-3-O-arabinoside (Juglanin)	山奈酚-3-O-阿拉伯糖苷 (胡桃苷)	Flavonoids	黄酮	Flavonols	黄酮醇	5041-67-8	A	FALSE	FALSE	down	1368100	1225800	1504000	895320	657470	763850	913250	884320	892240	629920	584880	597230	2444300	2159100	2650500	820800	935660	1009700	--	--
Lmlp005572	C21H20O10	Galangin-7-O-glucoside	高良姜素-7-O-葡萄糖苷	Flavonoids	黄酮	Flavonoid	黄酮	-	B	FALSE	FALSE	up	133870	141490	144420	244630	196560	208820	83442	73927	70947	103820	122470	114020	26925	38096	37817	77501	61085	75352	--	--
mws0919	C21H20O10	Kaempferol-3-O-rhamnoside (Afzelin)(Kaempferin)*	山奈酚-3-O-鼠李糖苷 (阿福豆苷)(番泻叶山奈苷)*	Flavonoids	黄酮	Flavonols	黄酮醇	482-39-3	A	FALSE	FALSE	down	5767500	5614300	5447500	3576800	3431700	3408400	3830400	3822200	3595600	1930300	2019200	2207400	5264000	5135500	4857700	2674400	2428200	2348600	C16911	ko00944
Lmhp009187	C20H42NO7P	LysoPE 15:0	溶血磷脂酰乙醇胺 15:0	Lipids	脂质	LPE	溶血磷脂酰乙醇胺	-	B	FALSE	FALSE	down	5822.7	6168.5	5440.9	5331.3	4502.3	5238.2	9225.5	9123	9093.3	6006.8	8204.2	6905.5	21229	22172	18186	9161.1	8985.1	10567	--	--
Lmhp008885	C20H42NO7P	LysoPE 15:0(2n isomer)	溶血磷脂酰乙醇胺 15:0(2n异构)	Lipids	脂质	LPE	溶血磷脂酰乙醇胺	-	B	FALSE	FALSE	down	5977.8	7263.8	6478.7	5161.5	4341.2	5779	8327.3	7421.7	9797.1	6570.4	6796.5	5933.9	19691	19962	19396	7187.9	8719.2	7557.2	--	--
mws0355	C22H18O10	Catechin gallate*	儿茶素没食子酸酯*	Flavonoids	黄酮	Flavanols	黄烷醇类	130405-40-2	B	FALSE	FALSE	down	4893.1	6725.4	5211.7	9491.5	10125	7050.7	6160.6	7697.4	3693	6747.5	7333	4282.1	6442.2	2445.4	5190	9	9	9	--	--
mws1397	C22H18O10	Epicatechin gallate*	表儿茶素没食子酸酯*	Flavonoids	黄酮	Flavanols	黄烷醇类	1257-08-5	B	FALSE	down	FALSE	5282.1	6241.1	7203.9	9689.2	8460.3	7163.6	5073.4	2511.8	4700	9	9	9	3428	5660.3	6232.6	2490.6	3118.7	4693.2	--	--
pme2459	C21H20O11	Luteolin-7-O-glucoside (Cynaroside)	木犀草素-7-O-葡萄糖苷 (木犀草苷)	Flavonoids	黄酮	Flavonoid	黄酮	5373-11-5	A	down	FALSE	down	6252200	5078200	5998400	2670200	2338300	2599500	7405700	7250800	8260400	4837200	4935700	4096600	30489000	29976000	29691000	10279000	8825000	9788100	C03951	ko00944
pmn001716	C21H20O11	Carthamone	醌式红花苷	Flavonoids	黄酮	Chalcones	查耳酮	86579-00-2	A	FALSE	FALSE	down	367460	281800	364810	175620	205100	206800	505780	530210	437430	343300	327430	320070	2116900	1916900	1864700	546370	558240	511050	C08598	--
Xmyp005654	C21H20O11	Kaempferol-4'-O-glucoside	山奈酚-4'-O-葡萄糖苷	Flavonoids	黄酮	Flavonoid	黄酮	-	A	down	FALSE	down	7400800	7063200	7339100	3321400	2829800	3141000	9568900	9187600	9632500	6078400	5531700	5513300	33932000	31555000	34876000	11627000	10055000	11225000	--	--
mws0057	C21H22O11	Eriodictyol-7-O-glucoside	圣草酚-7-O-葡萄糖苷	Flavonoids	黄酮	Dihydroflavone	二氢黄酮	38965-51-4	A	FALSE	FALSE	up	224370	258990	245510	136280	154230	163630	217440	261580	269930	210100	217210	208800	9	9	9	106100	105800	117050	--	--
Li512113	C20H20O12	Maleoyl-caffeoylquinic acid	顺丁烯二酰基-咖啡酰奎宁酸	Phenolic acids	酚酸类	Phenolic acids	酚酸类	-	B	FALSE	FALSE	up	18266	14219	26068	14046	20932	19339	15539	16945	11121	20121	14433	15111	9	9	9	14297	9538.4	8211.1	--	--
Lmhn002683	C22H18O11	p-Coumaroylcaffeoyltartaric acid	对香豆酰咖啡酰酒石酸	Phenolic acids	酚酸类	Phenolic acids	酚酸类	-	B	up	FALSE	FALSE	4811.6	8686.6	6698	14437	28415	19333	11681	13293	8006.9	15619	10540	23181	78808	83162	77707	105100	107560	109270	--	--
pmb2654	C19H27NO12	Anthranilate-1-O-Sophoroside	邻氨基苯甲酸-1-O-槐糖苷	Phenolic acids	酚酸类	Phenolic acids	酚酸类	-	A	FALSE	FALSE	down	226630	213820	192960	201360	192900	234430	212730	205860	235480	247930	256250	244070	505950	519800	389980	194570	190540	179510	--	--
Lmmp004257	C22H22O11	6-C-Methylquercetin-3-O-rhamnoside	6-C-甲基槲皮素-3-O-鼠李糖苷	Flavonoids	黄酮	Flavonols	黄酮醇	-	B	down	FALSE	FALSE	3630.6	5354.5	3752.9	9	9	9	9	9	9	9	9	9	5691.1	6120.6	7245.9	3303.2	4827.9	5498.8	--	--
Hmdn001667	C20H16O13	Ellagic acid-4-O-glucoside	鞣花酸-4-O-葡萄糖苷	Tannins	鞣质	Tannin	鞣质	-	B	FALSE	FALSE	down	23732	22366	21916	20641	18657	15218	62805	49893	50073	22113	27121	35683	209490	218840	233620	55589	85182	57823	--	--
Lmhp009464	C22H44NO7P	LysoPE 17:1(2n isomer)	溶血磷脂酰乙醇胺 17:1(2n异构)	Lipids	脂质	LPE	溶血磷脂酰乙醇胺	-	B	FALSE	up	FALSE	3845.3	3970.9	3764.1	6422	3515.3	3520.5	9	9	9	1586.1	2144.2	1195.2	4474.9	3307.4	4236.1	5442.5	3873.6	3844	--	--
HJAP154	C23H16O11	Galloylisorhamnetin*	没食子酰异鼠李素*	Flavonoids	黄酮	Flavonols	黄酮醇	-	B	FALSE	up	down	29284	34141	29147	21548	27814	20922	19273	16346	12654	45039	44524	45967	22638	16862	14958	8928.5	2695.5	4789.8	--	--
Hmmp002121	C23H16O11	Isorhamnetin-3-O-gallate*	异鼠李素-3-O-没食子酸酯*	Flavonoids	黄酮	Flavonols	黄酮醇	-	B	FALSE	up	down	24036	25179	23146	13634	13697	20138	20090	17252	16800	44602	60488	41798	14185	20531	15709	9	9	9	--	--
pmp000441	C30H46O4	11-Keto-ursolic acid	11-酮基-熊果酸	Terpenoids	萜类	Triterpene	三萜	105870-59-5	B	FALSE	down	down	10284	7296.2	11443	14503	15571	14141	64458	51429	53021	21108	21214	25020	90679	92670	94548	19865	21146	24296	--	--
Zmhn002508	C21H28O12	4-p-Cumaroyl-rhamnosyl-(1→6)-D-glucose	4-对香豆酰鼠李糖基-(1→6)-D-葡萄糖	Phenolic acids	酚酸类	Phenolic acids	酚酸类	-	B	down	down	down	270160	220800	277410	108910	95241	122970	273740	235320	226390	71641	66572	87053	246200	223790	238680	75871	92874	95040	--	--
Lmsn012425	C30H48O4	Rubusic acid (3β,7α-Dihydroxyolean-12-en-28-oic acid)	3β,7α-二羟基齐墩果-12-烯-28-酸	Terpenoids	萜类	Triterpene	三萜	23984-26-1	A	FALSE	FALSE	down	375.27	345.55	690.96	1165.9	791.43	829.13	829.8	1261.8	1131.4	814.01	1253.9	987.06	6000	5398.8	4840.5	1570.4	1908.8	2254.8	--	--
Lmmp003783	C21H18O13	Quercetin-3-O-glucuronide	槲皮素-3-O-葡萄糖醛酸苷	Flavonoids	黄酮	Flavonols	黄酮醇	22688-79-5	B	FALSE	FALSE	down	96914	94864	97524	46326	50308	53310	57313	54991	51319	34527	34645	34706	143250	172430	183760	78780	60139	73710	--	--
Zmhn002764	C22H22O12	4-O-(6'-O-Glucosylcaffeoyl)-3,4-dihydroxybenzoic acid*	4-O-(6'-O-葡萄糖基咖啡酰)-3,4-二羟基苯甲酸*	Phenolic acids	酚酸类	Phenolic acids	酚酸类	-	B	down	down	down	50985	43079	59108	9014.7	11677	6621.8	40924	38341	35550	11639	13589	3976.1	30506	37600	29570	11486	12298	9093.9	--	--
Lmjp002906	C22H22O12	Rhamnetin-3-O-Glucoside	鼠李素-3-O-葡萄糖苷	Flavonoids	黄酮	Flavonols	黄酮醇	27875-34-9	B	down	FALSE	FALSE	2997500	2683300	2840000	1452900	1232200	1406300	2779600	2844500	2774100	2213200	2251900	2066900	3771500	4087800	3879400	2570900	2401600	2453400	--	--
Lmdp002969	C21H20O13	Myricetin-3-O-galactoside	杨梅素-3-O-半乳糖苷	Flavonoids	黄酮	Flavonols	黄酮醇	15648-86-9	B	FALSE	FALSE	down	9	9	9	9	9	9	9	9	9	9	9	9	401600	534430	385060	151500	176090	176580	--	--
pmb3072	C22H26O12	3-O-p-Coumaroylshikimic acid-O-glucoside	3-O-对香豆酰莽草酸-O-葡萄糖苷	Phenolic acids	酚酸类	Phenolic acids	酚酸类	-	B	down	FALSE	FALSE	33883	19623	25155	12461	12322	11709	42143	44607	45896	40746	46562	36851	255310	282630	253980	160950	174240	171410	--	--
pmb2723	C21H26O13	4-Hydroxycoumarin di-glucoside	4-羟基香豆素 二葡萄糖苷	Lignans and Coumarins	木脂素和香豆素	Coumarins	香豆素	-	B	FALSE	FALSE	down	9	9	9	9	9	9	10160	9957.7	6539.2	4834.2	4443.5	5434.7	226240	201450	213310	97773	80233	93066	--	--
Lmsn011201	C30H46O5	Swinhoeic acid	2α,3β-二羟基-19-羰基-18,19-开环熊果-11,13(18)-二烯-28-酸	Terpenoids	萜类	Triterpene	三萜	-	B	FALSE	FALSE	down	9	9	9	9	9	9	11618	10483	11996	7327.4	6151	6016.6	73087	75351	77439	3868.3	3214.4	3222.5	--	--
Lmzn005892	C30H46O5	Isoceanothic acid	异美洲茶酸	Terpenoids	萜类	Triterpene	三萜	-	B	up	FALSE	down	3970.3	4362.4	5636	9906.4	9272.4	11263	27200	27700	27128	30707	26740	25072	64426	60848	66649	20421	21511	21733	--	--
Lmsn011015	C30H46O5	1-Oxo-Siaresinolic acid	1-羰基-泰国树脂酸	Terpenoids	萜类	Triterpene	三萜	-	B	FALSE	FALSE	down	9	9	9	9	9	9	11860	10392	11297	6201	5983	5800.1	80327	76446	78438	3975.8	5068.3	3199.5	--	--
pmn001708	C30H48O5	Asiatic acid	积雪草酸	Terpenoids	萜类	Triterpene	三萜	464-92-6	A	FALSE	FALSE	down	299620	241810	282550	380610	371210	390960	875150	794320	835730	828520	763990	721870	2243500	2357900	2338300	932570	885930	877560	C08617	--
Lmmp003903	C23H22O12	Kaempferol-3-O-(2''-acetyl)glucoside	山奈酚-3-O-(2''-O-乙酰)葡萄糖苷	Flavonoids	黄酮	Flavonols	黄酮醇	-	B	FALSE	down	down	9545	6420.6	8329.9	4852.2	4105.6	5466.9	9824.9	8465.4	10001	4675	4564.8	4745.9	140310	132200	147770	13213	14922	14359	--	--
pmd0132	C24H50NO7P	LysoPC 16:0(2n isomer)	溶血磷脂酰胆碱 16:0(2n异构)	Lipids	脂质	LPC	溶血磷脂酰胆碱	-	A	FALSE	FALSE	down	82041	75765	83536	82937	79079	88555	109920	100600	99436	100200	97421	98896	172160	142780	146720	72864	67899	67515	--	--
pmb3064	C22H28O13	3-O-p-Coumaroylquinic acid-O-glucoside	3-O-对香豆酰奎宁酸-O-葡萄糖苷	Phenolic acids	酚酸类	Phenolic acids	酚酸类	-	B	up	FALSE	FALSE	4229	3593.6	5522.9	9618.1	9834.2	7677.5	8159.8	8982.7	6830.5	11735	12657	7787.1	20357	17936	22198	8314.9	14787	7720.3	--	--
pmp000270	C30H44O6	Lup-12-en-15α,19β-diol-3,11-dioxo-28-oic acid*	Lup-12-烯-15α,19β-二醇-3,11-二氧-28-酸*	Terpenoids	萜类	Triterpene	三萜	-	A	FALSE	FALSE	down	1263.3	983.55	995.59	988.34	1300.6	1346.2	5549.3	4650.3	4424.2	5857	6248.3	5499.2	36364	32242	33286	10533	12524	12779	--	--
mad2394	C24H22O12	Sinapoyl-p-coumaroyltartaric acid	芥子酰对香豆酰酒石酸	Phenolic acids	酚酸类	Phenolic acids	酚酸类	-	B	down	FALSE	FALSE	138320	121650	136050	56704	55559	52796	566430	556650	573700	331820	320390	312790	449810	494260	479230	387530	365580	346400	--	--
Lmhn003799	C24H22O12	Feruloylferuloyltartaric acid	阿魏酰阿魏酰酒石酸	Phenolic acids	酚酸类	Phenolic acids	酚酸类	-	B	FALSE	down	FALSE	64570	64986	69267	40232	42298	40672	54916	65086	56550	31774	25504	26692	38255	36354	43452	25522	26186	26463	--	--
Lmsn009900	C30H46O6	1β-Hydroxy-2-oxopomolic acid	1β-羟基-2-羰基坡模酸	Terpenoids	萜类	Triterpene	三萜	217466-37-0	A	up	FALSE	down	4347.2	3481.9	3573.4	10910	9916	10722	49042	53534	9	27174	17157	25258	45964	107380	45653	25514	28483	26883	--	--
Lmsn010604	C30H46O6	2α,3α,19α-Trihydroxyurs-12-en-23-formyl-28-oic Acid	2α,3α,19α-三羟基熊果-12-烯-23-甲酰-28-酸	Terpenoids	萜类	Triterpene	三萜	-	B	FALSE	up	FALSE	1058.2	1273.6	2354.8	2499.6	1504.2	2077.7	1839.5	2372.6	1588.2	9594.2	3811.3	5520.7	10134	12104	9243.3	6988.5	8439.5	8230.6	--	--
Lmsn004970	C24H24O12	3,6-Di-O-caffeoyl glucose	3,6-二-O-咖啡酰葡萄糖	Phenolic acids	酚酸类	Phenolic acids	酚酸类	-	A	down	down	down	155350	154840	166310	47382	45139	43388	365810	387860	339380	153100	135390	122010	347460	287250	369790	101450	114430	88846	--	--
Zmhn003076	C24H24O12	((2R,3R,5R,6R)-6-(((E)-3-(3,4-dihydroxyphenyl)acryloyl)oxy)-3,4,5-trihydroxytetrahydro-2H-pyran-2-yl)methyl (Z)-3-(3,4-dihydroxyphenyl)acrylate	((2R,3R,5R,6R)-6-(((E)-3-(3,4-二羟基苯基)丙烯酰基)氧基)-3,4,5-三羟基-四氢-2H-2-基)甲基(Z)-3-(3,4-二羟基苯基)丙烯酸酯	Phenolic acids	酚酸类	Phenolic acids	酚酸类	-	B	down	down	down	300470	272690	319130	59313	59504	71609	392860	376700	385430	92069	86250	97064	341400	473090	332860	45544	43493	55036	--	--
pmp000271	C30H48O6	1β,2α,3α,19α-Tetrahydroxyurs-12-en-28-oic acid	1β,2α,3α,19α-四羟基乌苏-12-烯-28-酸	Terpenoids	萜类	Triterpene	三萜	120211-98-5	B	FALSE	down	down	12245	8212.7	11250	20055	18857	23773	113390	111430	108250	41121	28021	40655	126880	121900	124680	58499	60991	60577	--	--
pmn001407	C30H48O6	Platycogenic acid C	桔梗酸 C	Terpenoids	萜类	Triterpene	三萜	26121-81-3	A	up	FALSE	down	771230	570970	662260	1946600	1818500	1781500	2308100	2086600	2216800	1423300	1410900	1557700	13733000	10709000	12324000	3531100	3052400	2805700	--	--
Lmsn009824	C30H48O6	2α,3β,19α,23-Tetrahydroxyolean-12-en-28-oic acid*	2α,3β,19α,23-四羟基齐墩果-12-烯-28-酸*	Terpenoids	萜类	Triterpene	三萜	55306-03-1	B	up	FALSE	down	9	9	9	3201.7	2694.6	3405.7	16956	17820	14681	9394.7	6675.1	8927.5	75121	188510	104250	27529	29856	21635	--	--
Hmjp003546	C30H48O6	Madecassic acid	羟基积雪草酸	Terpenoids	萜类	Triterpene	三萜	18449-41-7	B	up	down	down	1362.3	1122.5	1251	1599.2	3071.1	3086.7	12696	13028	16041	4382.2	6106.6	5640.3	53056	39843	21750	9	9	9	--	--
Zmsp004363	C23H22O13	Quercetin-3-O-(6''-acetyl)glucoside	槲皮素-3-O-(6''-乙酰)葡萄糖苷	Flavonoids	黄酮	Flavonols	黄酮醇	-	A	down	FALSE	FALSE	275900	231750	276540	97485	90664	95396	333790	355830	344120	277680	280600	294480	1081100	1059300	1043000	632530	602200	647620	--	--
Hmln002199	C23H22O13	Quercetin-3-O-(6''-acetyl)galactoside	槲皮素-3-O-(6''-乙酰)半乳糖苷	Flavonoids	黄酮	Flavonols	黄酮醇	-	A	down	FALSE	down	1475600	1247900	788860	534350	611400	406380	1188400	968810	748880	947490	722720	540730	4528500	5033900	5100600	2679200	1660300	2336600	--	--
pmn001382	C25H24O12	Isochlorogenic acid A*	异绿原酸 A*	Phenolic acids	酚酸类	Phenolic acids	酚酸类	2450-53-5	B	FALSE	FALSE	down	12717	6518.3	16049	11706	8697.9	8022.8	14253	7180.2	4008.2	3684.4	8035.9	6031.7	25780	57911	46182	13021	13692	14394	--	--
Li512115	C25H24O12	Isochlorogenic acid B*	异绿原酸 B*	Phenolic acids	酚酸类	Phenolic acids	酚酸类	14534-61-3	B	FALSE	FALSE	down	12576	22300	13617	10825	11634	13596	11479	11992	11348	5335.6	7214.2	10934	41611	53660	42397	11715	12002	14008	C10468	--
mws1584	C25H24O12	1,3-O-Dicaffeoylquinic Acid (Cynarin)	1,3-O-双咖啡酰奎宁酸(洋蓟酸)	Phenolic acids	酚酸类	Phenolic acids	酚酸类	30964-13-7	B	FALSE	FALSE	down	9	9	9	9	9	9	84847	87015	63243	52782	51999	35703	270530	337760	250080	59171	53956	80942	C10445	--
pmn001384	C25H24O12	Isochlorogenic acid C*	异绿原酸 C*	Phenolic acids	酚酸类	Phenolic acids	酚酸类	57378-72-0	B	FALSE	FALSE	down	17998	12939	16752	11528	11261	11996	18449	10585	16755	7999	9826.8	7051.7	43629	34455	39787	15350	14128	15982	--	--
Zmhn000785	C19H32O16	Di-O-Glucosylquinic acid	二-O-葡萄糖基奎宁酸	Phenolic acids	酚酸类	Phenolic acids	酚酸类	-	A	FALSE	FALSE	down	54325	45237	42947	17356	52856	46968	75160	68162	46206	63910	59962	79784	138340	136860	129710	32891	47996	49139	--	--
Zmhn003515	C25H26O12	(2R,3R,5R,6R)-6-((((Z)-3-(3,4-dihydroxyphenyl)acryloyl)oxy)methyl)-3,4,5-trihydroxytetrahydro-2H-pyran-2-yl (E)-3-(4-hydroxy-3-methoxyphenyl)acrylate	(2R,3R,5R,6R)-6-((((Z)-3-(3,4-二羟基苯基)丙烯酰基)氧基)甲基)-3,4,5-三羟基-四氢-2H-2-基(E)-3-(4-羟基-3-甲氧基苯基)丙烯酸酯	Phenolic acids	酚酸类	Phenolic acids	酚酸类	-	B	down	down	down	1925100	1786700	1949200	829030	831940	813030	1940100	1917700	1760900	754130	743100	720630	1328100	1318100	1361000	371090	361410	347530	--	--
pmn001644	C23H20O14	Quercetin-3-O-(2''-acetyl)glucuronide	槲皮素-3-O-(2''-乙酰)葡萄糖醛酸苷	Flavonoids	黄酮	Flavonols	黄酮醇	-	B	FALSE	FALSE	down	44531	45060	39836	29798	28210	28759	25154	15485	27814	21645	13546	13811	50440	58975	53244	19055	12539	16080	--	--
Li512111	C24H24O13	Isorhamnetin-3-O-(6''-acetylglucoside)	异鼠李素-3-O-(6''-乙酰)葡萄糖苷	Flavonoids	黄酮	Flavonols	黄酮醇	-	B	down	FALSE	FALSE	12220	13352	15734	7114.3	5890.6	7410.3	20349	18648	18334	16891	14912	13649	31642	33923	30186	23263	20936	21338	--	--
Lmsn008066	C30H48O7	1β,2α,3α,19α,23-Pentahydroxyurs-12-en-28-oic acid	1β,2α,3α,19α,23-五羟基熊果-12-烯-28-酸	Terpenoids	萜类	Triterpene	三萜	-	B	up	FALSE	down	1329.2	1332.1	1802.1	6925.2	5283.9	4537.5	10072	9600.7	8978.3	12865	14056	11177	82038	71996	80741	18580	18671	19258	--	--
Lmsn008908	C30H48O7	2α,3β,19α,23,24-Pentahydroxyolean-12-en-28-oic acid	2α,3β,19α,23,24-五羟基齐墩果-12-烯-28-酸	Terpenoids	萜类	Triterpene	三萜	-	B	FALSE	FALSE	down	996.1	673.11	1260.3	2230.9	1372.8	1293.7	4437.1	3414.8	3540.6	4453.2	3537.6	3648.7	18263	17046	15623	8964.2	6842.4	6747.2	--	--
pmd0136	C26H54NO7P	LysoPC 18:0(2n isomer)	溶血磷脂酰胆碱 18:0(2n异构)	Lipids	脂质	LPC	溶血磷脂酰胆碱	-	B	FALSE	FALSE	down	9812	9495	11422	8956	8611.9	8864.7	12519	13223	12757	11130	10168	11231	30050	25074	28304	11014	13004	13531	--	--
Lmhn003801	C25H24O13	Feruloylsinapoyltartaric acid	阿魏酰芥子酰酒石酸	Phenolic acids	酚酸类	Phenolic acids	酚酸类	-	A	down	down	down	613180	688990	636050	223850	210460	212500	598000	635030	601510	276070	272260	255250	559440	526690	535880	232510	235690	220260	--	--
Lmmp003817	C24H22O14	Kaempferol-3-O-(6''-malonyl)glucoside*	山奈酚-3-O-(6''-丙二酰)葡萄糖苷*	Flavonoids	黄酮	Flavonols	黄酮醇	-	B	FALSE	down	down	154790	128190	157520	80167	77057	64591	216840	215110	199490	103450	112900	98691	2271900	2276300	2359300	393480	377220	399970	--	--
Lmdp004892	C24H22O14	Kaempferol-3-O-(6''-malonyl)galactoside*	山奈酚-3-O-(6''-丙二酰)半乳糖苷*	Flavonoids	黄酮	Flavonols	黄酮醇	-	B	FALSE	FALSE	down	152290	127480	147680	70839	79159	69293	190240	199220	198220	118400	116030	101510	2234200	2232900	2192100	376460	348540	362090	--	--
pmb0542	C24H23O14+	Cyanidin-3-O-(6''-O-malonyl)glucoside	矢车菊素-3-O-(6''-O-丙二酰)葡萄糖苷	Flavonoids	黄酮	Anthocyanins	花青素	171828-62-9	A	FALSE	FALSE	up	9	9	9	9	9	9	87678	90198	69287	164940	180960	118430	564860	665950	591660	1442600	1265400	1455400	C12643	ko00942
HJAP064	C25H24O15	Isorhamnetin-3-O-(6''-malonylglucoside)	异鼠李素-3-O-(6''-丙二酰)葡萄糖苷	Flavonoids	黄酮	Flavonoid	黄酮	-	B	down	FALSE	FALSE	57851	43980	49337	20739	17500	16488	78147	77123	85330	65264	58299	57425	124580	130670	129520	90656	97039	90092	--	--
pmb2936	C28H32O14	Disinapoyl glucoside	二芥子酰葡萄糖苷	Phenolic acids	酚酸类	Phenolic acids	酚酸类	-	B	FALSE	FALSE	up	3585.3	3477.5	3159.2	4038.6	6690.8	4910.8	2046.6	2635.6	2382.6	4638.3	3150.5	2655.9	9	9	9	1815.3	1428.5	2049.5	--	--
pmp001135	C30H26O13	Biondnoid I	望春花黄酮醇苷 I	Flavonoids	黄酮	Flavonols	黄酮醇	142750-32-1	A	down	down	down	64277	43224	60126	27570	17247	25036	98158	71565	71919	33275	38640	29288	1231600	1148200	1179700	162190	144370	166880	--	--
mws1290	C30H26O13	Kaempferol-3-O-(6''-p-Coumaroyl)glucoside (Tiliroside)	山奈酚-3-O-(6''-对香豆酰)葡萄糖苷 (银锻苷)	Flavonoids	黄酮	Flavonols	黄酮醇	20316-62-5	A	FALSE	down	down	95112	59786	106270	73799	46728	60029	145580	87078	83022	42424	65483	36242	715830	753200	720560	135240	131760	149150	C17140	--
Lmsn002815	C27H30O15	Kaempferol-3-O-rutinoside(Nicotiflorin)	山奈酚-3-O-芸香糖苷(烟花苷)	Flavonoids	黄酮	Flavonoid	黄酮	17650-84-9	A	down	down	down	32692	27511	38046	17778	9859.5	15591	114450	78618	103660	37150	26311	21531	1430900	1454900	1405300	62704	65274	77116	C21833	ko00944,ko01110
Lmjp002867	C27H30O15	Kaempferol-3-O-neohesperidoside	山奈酚-3-O-新橙皮糖苷	Flavonoids	黄酮	Flavonols	黄酮醇	32602-81-6	A	down	down	down	273670	288200	269720	105050	104500	101590	775900	770120	636790	313560	295830	267890	11140000	9917100	11598000	609040	614650	574200	--	--
Lmsp004670	C27H30O15	Kaempferol-3-O-glucoside-7-O-rhamnoside	山奈酚-3-O-葡萄糖苷-7-O-鼠李糖苷	Flavonoids	黄酮	Flavonols	黄酮醇	-	A	down	down	down	334020	265170	245960	97254	92460	101800	732450	755370	762120	315470	260810	276640	11041000	12124000	11253000	646220	592930	622340	--	--
mws0791	C28H34O14	Poncirin (Isosakuranetin-7-O-neohesperidoside)	枸橘苷	Flavonoids	黄酮	Dihydroflavone	二氢黄酮	14941-08-3	B	FALSE	FALSE	down	90218	69853	109890	70878	47678	68145	135160	92835	76758	47658	73027	35821	816370	743070	728780	137490	153350	155340	C09830	--
pme1773	C27H31O15+	Cyanidin-3-O-rutinoside (Keracyanin)	矢车菊素-3-O-芸香糖苷	Flavonoids	黄酮	Anthocyanins	花青素	28338-59-2	A	FALSE	up	FALSE	9	9	9	9	9	9	125980	125710	117110	277980	258000	282080	407770	428230	406660	573470	592280	611220	C08620	ko00942
Lmjp002596	C26H28O16	Quercetin-3-O-sambubioside*	槲皮素-3-O-桑布双糖苷*	Flavonoids	黄酮	Flavonols	黄酮醇	83048-35-5	A	down	FALSE	FALSE	736950	743870	605730	255700	292800	308430	1206300	1172900	1412300	818430	901140	1070700	600870	1199600	495680	1095200	1333300	1403300	C12637	ko00944
Lmyp004052	C30H26O14	Quercetin-3-O-(6''-p-Coumaroyl)galactoside*	槲皮素-3-O-(6''-对香豆酰)半乳糖苷*	Flavonoids	黄酮	Flavonols	黄酮醇	-	A	down	FALSE	FALSE	1835800	1651900	1834100	673080	557330	566060	2118800	1824200	1803500	1317600	1369300	1304300	9499600	9354600	9665700	5021600	4531600	5378200	--	--
Lmdp004267	C30H26O14	Quercetin-3-O-(6''-p-Coumaroyl)glucoside*	槲皮素-3-O-(6''-对香豆酰)葡萄糖苷*	Flavonoids	黄酮	Flavonols	黄酮醇	-	A	down	FALSE	FALSE	234980	193760	246380	87549	76591	82183	287440	242930	228230	165860	178150	181210	962750	924170	991250	527810	490240	589350	--	--
mws0059	C27H30O16	Quercetin-3-O-rutinoside (Rutin)	槲皮素-3-O-芸香糖苷 (芦丁)	Flavonoids	黄酮	Flavonols	黄酮醇	153-18-4	A	down	FALSE	down	6664100	6497400	7222000	1841600	1787300	1494200	12992000	12960000	13556000	7592200	7563300	6927000	32329000	30022000	32831000	14555000	13907000	14451000	C05625	ko00944,ko01100,ko01110
Lmsp004166	C27H30O16	Quercetin-3-O-glucoside-7-O-rhamnoside	槲皮素-3-O-葡萄糖苷-7-O-鼠李糖苷	Flavonoids	黄酮	Flavonols	黄酮醇	-	A	down	FALSE	down	661330	536560	562120	169280	145930	159880	1147700	1213700	1258000	664380	748240	621790	3514100	3639700	3649800	1069600	1197600	1189800	--	--
pmn001583	C27H30O16	Quercetin-3-O-robinobioside	槲皮素-3-O-洋槐糖苷	Flavonoids	黄酮	Flavonols	黄酮醇	52525-35-6	A	down	FALSE	down	7080100	7657600	8540200	2674700	2330600	2774200	15785000	15833000	14425000	9901400	10031000	9016100	38140000	39072000	32286000	16384000	16266000	14814000	--	--
Lmbp002336	C27H30O16	Quercetin-3-O-(2''-O-rhamnosyl)galactoside	槲皮素-3-O-(2''-O-鼠李糖基)半乳糖苷	Flavonoids	黄酮	Flavonols	黄酮醇	-	A	down	FALSE	FALSE	90549	85456	77948	32494	39201	35080	97852	82498	93952	63544	47546	55787	74962	81219	72020	45790	48928	47786	--	--
pme0001	C28H34O15	Hesperetin-7-O-neohesperidoside(Neohesperidin)*	橙皮素-7-O-新橙皮糖苷 (新橙皮苷)*	Flavonoids	黄酮	Dihydroflavone	二氢黄酮	13241-33-3	B	FALSE	down	up	22944	32052	25221	21955	16849	25036	32092	34651	37159	12263	16014	12223	9	9	9	28021	23071	14914	C09806	ko00941
mws0036	C28H34O15	Hesperetin-7-O-rutinoside (Hesperidin)*	橙皮素-7-O-芸香糖苷 (橙皮苷)*	Flavonoids	黄酮	Dihydroflavone	二氢黄酮	520-26-3	B	FALSE	down	FALSE	19796	23565	19615	19094	28073	19262	21151	30494	33399	9685.3	11348	18876	13363	12073	17754	19069	18741	15437	C09755	--
pme1777	C27H31O16+	Cyanidin-3,5-O-diglucoside (Cyanin)	矢车菊素-3,5-二-O-葡萄糖苷	Flavonoids	黄酮	Anthocyanins	花青素	2611-67-8	A	FALSE	up	FALSE	9	9	9	9	9	9	657500	850440	705660	1440500	1518300	1548600	3222100	3168400	3441500	4753800	4606000	4359800	C08639	ko00942
Lmsp004721	C28H32O16	Tamarixetin-3-O-glucoside-7-O-rhamnoside	柽柳黄素-3-O-葡萄糖苷-7-O-鼠李糖苷	Flavonoids	黄酮	Flavonoid	黄酮	-	A	down	FALSE	FALSE	137450	155430	126610	87057	54138	64247	242140	243840	220680	202520	203010	180830	204740	230540	210090	158710	175710	186820	--	--
Hmlp003068	C27H30O17	Meratin	蜡梅苷	Flavonoids	黄酮	Flavonoid	黄酮	27215-04-9	A	down	down	down	171250	149700	180650	25681	28288	25797	1775300	1721300	1724500	760490	792900	770180	1905200	1912700	1920700	625890	610230	629660	--	--
pmp000596	C27H30O17	Quercetin-3-O-(2''-O-galactosyl)glucoside	槲皮素-3-O-(2''-O-半乳糖基)葡萄糖苷	Flavonoids	黄酮	Flavonols	黄酮醇	56782-99-1	A	down	FALSE	FALSE	483350	522750	499750	248730	232960	202640	594860	630200	570470	563250	490260	436270	846640	755960	879510	696450	708620	616790	--	--
Hmcp005575	C27H30O17	Quercetin-5,4ʹ-di-O-glucoside	槲皮素-5,4ʹ-二-O-葡萄糖苷	Flavonoids	黄酮	Flavonoid	黄酮	-	A	down	down	down	192150	166450	194050	83815	60827	57291	187080	163820	146830	81131	81872	65059	431630	463420	470050	148400	142200	199630	--	--
pmp001311	C27H30O17	6-Hydroxykaempferol-7,6-O-Diglucoside	6-羟基山奈酚-7,6-O-二葡萄糖苷	Flavonoids	黄酮	Flavonols	黄酮醇	-	A	down	down	down	247190	255370	193190	45379	29844	35049	2274400	2238300	2290600	1080600	1081300	1033200	2501300	2437900	2448300	854430	819870	823450	--	--
Lmtp003677	C27H30O17	Quercetin-3-O-sophoroside (Baimaside)	槲皮素-3-O-槐糖苷(白麻苷)	Flavonoids	黄酮	Flavonols	黄酮醇	18609-17-1	B	down	FALSE	FALSE	107410	215280	159870	76650	53371	51576	768470	793050	700570	761330	868520	867260	1177700	1143500	1242400	1228400	1229000	1292800	C12667	ko00944
pmp001310	C27H30O17	6-Hydroxykaempferol-3,6-O-Diglucoside	6-羟基山奈酚-3,6-O-二葡萄糖苷	Flavonoids	黄酮	Flavonols	黄酮醇	-	A	down	FALSE	down	319460	247980	315600	95469	104320	83361	498990	510920	483070	439400	334220	320280	1188200	1154900	1119800	589670	580210	556420	--	--
Lmsn006130	C36H56O12	2α,3β,19α-Trihydroxyurs-12-en-23,28-dioic acid-28-O-glucoside	2α,3β,19α-三羟基熊果-12-烯-23,28-二酸-28-O-葡萄糖苷	Terpenoids	萜类	Triterpene	三萜	-	B	up	FALSE	FALSE	9	9	9	2562.8	3033.2	3483.3	2986.3	1073.9	2093.6	3861.6	2458.8	1623.5	1353	1917.9	2983.9	3082.3	2598.5	4022	--	--
pmb0706	C30H32O20	Quercetin-3-O-(6''-malonyl)glucosyl-5-O-glucoside	槲皮素-3-O-(6''-丙二酰)葡萄糖苷-5-O-葡萄糖苷	Flavonoids	黄酮	Flavonols	黄酮醇	-	B	down	down	down	3182.9	4164.1	3656.5	9	9	9	5888.7	3784	5123.9	9	9	9	19176	22702	27668	7485.7	5842.8	10069	--	--
pmb0709	C30H32O20	Quercetin-7-O-(6''-malonyl)glucosyl-5-O-glucoside	槲皮素-7-O-(6''-丙二酰)葡萄糖苷-5-O-葡萄糖苷	Flavonoids	黄酮	Flavonols	黄酮醇	-	B	down	FALSE	FALSE	11154	10672	7910	4776	2666.8	2663.2	10084	9554.2	11142	10124	9060.2	7413.2	51308	55379	53032	38206	34533	33305	--	--
